# Supplementary material for: Evaluating the risk of data loss due to particle radiation damage in a DNA data storage system
Source: PubMed Central journal article supplement (PMC11401870; doi:10.1038/s41467-024-51768-x), 2024-09-14
Supplement: 41467_2024_51768_MOESM1_ESM.pdf [file 41467_2024_51768_MOESM1_ESM.pdf]

# Evaluating the Risk of Data Loss Due to Particle Radiation Damage in a DNA Data Storage System

Christopher N. Takahashi<sup>1</sup>, David P. Ward<sup>1</sup>, Carlo Cazzaniga<sup>2</sup>, Christopher Frost<sup>2</sup>, Paolo Rech<sup>3</sup>, Kumkum Ganguly<sup>4</sup>, Sean Blanchard<sup>4</sup>, Steve Wender<sup>4</sup>, Bichlien H. Nguyen<sup>1,5\*</sup> and Jake A. Smith<sup>1,5\*</sup>

<sup>1</sup>Paul G. Allen School of Computer Science and Engineering, University of Washington, Seattle, WA, USA.

<sup>2</sup>Science and Technology Facilities Council, Swindon, United Kingdom.

<sup>3</sup>University of Trento, Trento, Italy.

<sup>4</sup>Los Alamos National Laboratory, Los Alamos, NM, USA.

<sup>5\*</sup>Microsoft Research, Redmond, WA, USA.

\*Corresponding author(s). E-mail(s): [bnguy@microsoft.com](mailto:bnguy@microsoft.com); [jakesmith@microsoft.com](mailto:jakesmith@microsoft.com);

## Contents

**1 Regression Reports**

**2 Supplementary Figures**

**3 Monte Carlo Simulation**

001  
002  
003  
004  
005  
006  
007  
008  
009  
010  
011  
012  
013  
014  
015  
016  
017  
018  
019  
020  
021  
022  
023  
024  
025  
026  
027  
028  
029  
030  
031  
032  
033  
034  
035  
036  
037  
038  
039  
040  
041  
042  
043  
044  
045  
046

**2**  
**4**  
**5**

047 **1 Regression Reports**

048

049

 $\sigma_{nuc}^n$  Fitted With Sample Thickness Term

050

051

052

053

$$\log(\sigma^n) = \begin{cases} 0 & \log_{10}(E) < 6 \\ \beta_0 + \beta_1 \log_{10}(E) + \beta_2 \log_{10}(E)^2 + \beta_3 \log_{10}(E)^3 + \beta_4 \log_{10}(Lz) & 6 \leq \log_{10}(E) \leq 10 \\ 0 & \log_{10}(E) > 10 \end{cases}$$

054

055

056

057

058

059

060

061

|                         |                  |                          |            |
|-------------------------|------------------|--------------------------|------------|
| <b>Dep. Variable:</b>   | y                | <b>No. Observations:</b> | 160        |
| <b>Model:</b>           | Poisson          | <b>Df Residuals:</b>     | 155        |
| <b>Method:</b>          | MLE              | <b>Df Model:</b>         | 4          |
| <b>Date:</b>            | Fri, 15 Dec 2023 | <b>Pseudo R-squ.:</b>    | 0.5226     |
| <b>Time:</b>            | 12:40:57         | <b>Log-Likelihood:</b>   | -244.96    |
| <b>converged:</b>       | True             | <b>LL-Null:</b>          | -513.13    |
| <b>Covariance Type:</b> | nonrobust        | <b>LLR p-value:</b>      | 9.281e-115 |

062

063

064

065

066

067

068

|           | coef      | std err | t      | P > t | [0.025   | 0.975]   |
|-----------|-----------|---------|--------|-------|----------|----------|
| $\beta_1$ | 72.9389   | 10.428  | 6.995  | 0.000 | 52.340   | 93.538   |
| $\beta_2$ | -8.5132   | 1.332   | -6.389 | 0.000 | -11.145  | -5.881   |
| $\beta_3$ | 0.3223    | 0.056   | 5.715  | 0.000 | 0.211    | 0.434    |
| $\beta_4$ | -0.0192   | 0.035   | -0.548 | 0.585 | -0.089   | 0.050    |
| $\beta_0$ | -201.7467 | 27.038  | -7.462 | 0.000 | -255.158 | -148.336 |

069

070

071

072

 $\sigma_{H2O}^n$  Fitted With Sample Thickness Term

073

074

075

076

$$\log(\sigma^n) = \begin{cases} 0 & \log_{10}(E) < 6 \\ \beta_0 + \beta_1 \log_{10}(E) + \beta_2 \log_{10}(E)^2 + \beta_3 \log_{10}(E)^3 + \beta_4 \log_{10}(Lz) & 6 \leq \log_{10}(E) \leq 10 \\ 0 & \log_{10}(E) > 10 \end{cases}$$

077

078

079

080

081

082

083

084

|                         |                  |                          |           |
|-------------------------|------------------|--------------------------|-----------|
| <b>Dep. Variable:</b>   | y                | <b>No. Observations:</b> | 160       |
| <b>Model:</b>           | Poisson          | <b>Df Residuals:</b>     | 155       |
| <b>Method:</b>          | MLE              | <b>Df Model:</b>         | 4         |
| <b>Date:</b>            | Fri, 15 Dec 2023 | <b>Pseudo R-squ.:</b>    | 0.2322    |
| <b>Time:</b>            | 13:44:04         | <b>Log-Likelihood:</b>   | -56.592   |
| <b>converged:</b>       | True             | <b>LL-Null:</b>          | -73.704   |
| <b>Covariance Type:</b> | nonrobust        | <b>LLR p-value:</b>      | 6.704e-07 |

085

086

087

088

089

090

091

092

|           | coef      | std err | t      | P > t | [0.025   | 0.975]  |
|-----------|-----------|---------|--------|-------|----------|---------|
| $\beta_1$ | 144.5223  | 59.905  | 2.413  | 0.017 | 26.188   | 262.857 |
| $\beta_2$ | -17.1974  | 7.464   | -2.304 | 0.023 | -31.942  | -2.453  |
| $\beta_3$ | 0.6710    | 0.308   | 2.178  | 0.031 | 0.062    | 1.280   |
| $\beta_4$ | 0.0519    | 0.162   | 0.320  | 0.750 | -0.269   | 0.373   |
| $\beta_0$ | -400.3496 | 159.323 | -2.513 | 0.013 | -715.074 | -85.625 |

|                                                                                                                                                                                                                               |                                |
|-------------------------------------------------------------------------------------------------------------------------------------------------------------------------------------------------------------------------------|--------------------------------|
| $\sigma_{nuc}^n$ <b>Fitted With Fraction GC Content Term</b>                                                                                                                                                                  | 093                            |
|                                                                                                                                                                                                                               | 094                            |
| $\log(\sigma^n) = \begin{cases} 0 & \log_{10}(E) < 6 \\ \beta_0 + \beta_1 \log_{10}(E) + \beta_2 \log_{10}(E)^2 + \beta_3 \log_{10}(E)^3 + \beta_4 F_{GC} & 6 \leq \log_{10}(E) \leq 10 \\ 0 & \log_{10}(E) > 10 \end{cases}$ | 095                            |
|                                                                                                                                                                                                                               | 096                            |
|                                                                                                                                                                                                                               | 097                            |
| <hr/>                                                                                                                                                                                                                         | 098                            |
| <b>Dep. Variable:</b> y                                                                                                                                                                                                       | <b>No. Observations:</b> 160   |
| <b>Model:</b> Poisson                                                                                                                                                                                                         | <b>Df Residuals:</b> 155       |
| <b>Method:</b> MLE                                                                                                                                                                                                            | <b>Df Model:</b> 4             |
| <b>Date:</b> Fri, 15 Dec 2023                                                                                                                                                                                                 | <b>Pseudo R-squ.:</b> 0.5234   |
| <b>Time:</b> 13:48:33                                                                                                                                                                                                         | <b>Log-Likelihood:</b> -244.55 |
| <b>converged:</b> True                                                                                                                                                                                                        | <b>LL-Null:</b> -513.13        |
| <b>Covariance Type:</b> nonrobust                                                                                                                                                                                             | <b>LLR p-value:</b> 6.124e-115 |
|                                                                                                                                                                                                                               | 105                            |
| <b>coef</b> <b>std err</b> <b>t</b> <b>P &gt; t</b> <b>[0.025</b> <b>0.975]</b>                                                                                                                                               | 106                            |
| <hr/>                                                                                                                                                                                                                         | 107                            |
| <b>x1</b> 31.8624    4.542    7.015    0.000    22.890    40.835                                                                                                                                                              | 108                            |
| <b>x2</b> -1.6153    0.252    -6.409    0.000    -2.113    -1.117                                                                                                                                                             | 109                            |
| <b>x3</b> 0.0266    0.005    5.735    0.000    0.017    0.036                                                                                                                                                                 | 110                            |
| <b>x4</b> 1.9635    1.821    1.078    0.283    -1.633    5.560                                                                                                                                                                | 111                            |
| <b>const</b> -203.6525    27.153    -7.500    0.000    -257.290    -150.015                                                                                                                                                   | 112                            |
|                                                                                                                                                                                                                               | 113                            |
| <hr/>                                                                                                                                                                                                                         | 114                            |
| $\sigma_{H_2O}^n$ <b>Fitted With Fraction GC Content Term</b>                                                                                                                                                                 | 116                            |
|                                                                                                                                                                                                                               | 117                            |
| $\log(\sigma^n) = \begin{cases} 0 & \log_{10}(E) < 6 \\ \beta_0 + \beta_1 \log_{10}(E) + \beta_2 \log_{10}(E)^2 + \beta_3 \log_{10}(E)^3 + \beta_4 F_{GC} & 6 \leq \log_{10}(E) \leq 10 \\ 0 & \log_{10}(E) > 10 \end{cases}$ | 118                            |
|                                                                                                                                                                                                                               | 119                            |
|                                                                                                                                                                                                                               | 120                            |
| <hr/>                                                                                                                                                                                                                         | 121                            |
| <b>Dep. Variable:</b> y                                                                                                                                                                                                       | <b>No. Observations:</b> 160   |
| <b>Model:</b> Poisson                                                                                                                                                                                                         | <b>Df Residuals:</b> 155       |
| <b>Method:</b> MLE                                                                                                                                                                                                            | <b>Df Model:</b> 4             |
| <b>Date:</b> Fri, 15 Dec 2023                                                                                                                                                                                                 | <b>Pseudo R-squ.:</b> 0.2341   |
| <b>Time:</b> 13:51:05                                                                                                                                                                                                         | <b>Log-Likelihood:</b> -56.453 |
| <b>converged:</b> True                                                                                                                                                                                                        | <b>LL-Null:</b> -73.704        |
| <b>Covariance Type:</b> nonrobust                                                                                                                                                                                             | <b>LLR p-value:</b> 5.880e-07  |
|                                                                                                                                                                                                                               | 127                            |
| <b>coef</b> <b>std err</b> <b>t</b> <b>P &gt; t</b> <b>[0.025</b> <b>0.975]</b>                                                                                                                                               | 129                            |
| <hr/>                                                                                                                                                                                                                         | 130                            |
| <b>x1</b> 61.3290    25.954    2.363    0.019    10.061    112.597                                                                                                                                                            | 131                            |
| <b>x2</b> -3.1682    1.405    -2.255    0.026    -5.943    -0.393                                                                                                                                                             | 132                            |
| <b>x3</b> 0.0537    0.025    2.130    0.035    0.004    0.103                                                                                                                                                                 | 133                            |
| <b>x4</b> -5.7263    9.559    -0.599    0.550    -24.609    13.157                                                                                                                                                            | 134                            |
| <b>const</b> -389.2173    159.205    -2.445    0.016    -703.708    -74.726                                                                                                                                                   | 135                            |
|                                                                                                                                                                                                                               | 136                            |
|                                                                                                                                                                                                                               | 137                            |
|                                                                                                                                                                                                                               | 138                            |

139 **2 Supplementary Figures**

140

141

142

143

144

145

146

147

148

149

150

151

152

153

154

155

156

157

158

159

160

161

162

163

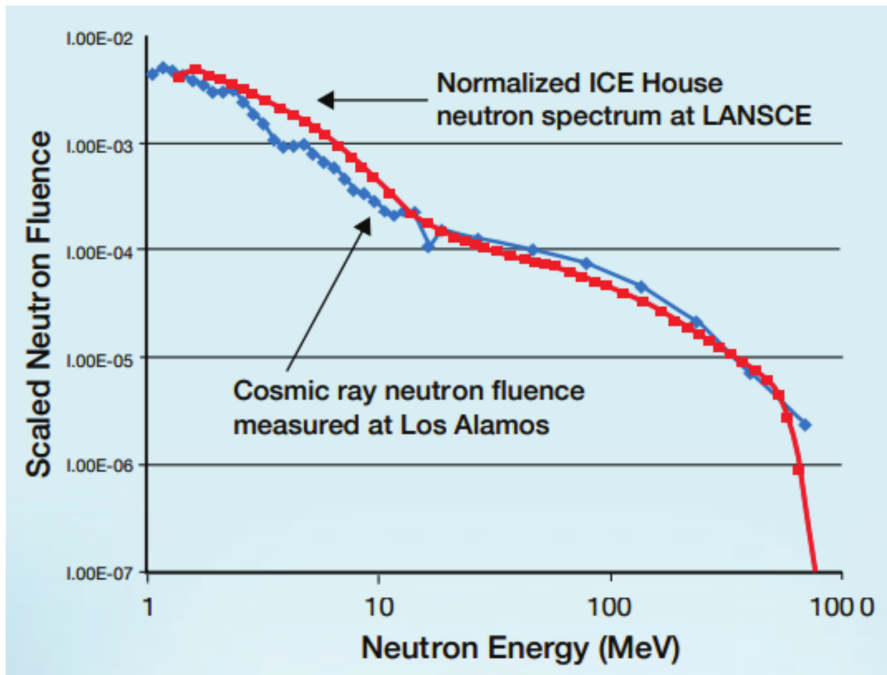

164 **Fig. 1** Plot of the neutron energy spectrum measured at LANSCE ICE as compared to the  
 165 background cosmic ray neutron fluence measured at LANSCE. Retrieved from the LANSCE  
 166 ICE House testing manual.

167

168

169

170

171

172

173

174

175

176

177

178

179

180

181

182

183

184

### 3 Monte Carlo Simulation

The supplementary software file `run_simulation.py` was used for approximation of  $\sigma_{nuc}^n$  and  $\sigma_{H2O}^n$  by Monte Carlo simulation. To replicate, please take the following steps.

- Prepare a Python environment that includes the packages `numpy`, `pandas`, and `scipy`.
- Divide the pre-formatted data files found in tabs of the provided Excel sheet into a series of `.csv` files.
- Set an environmental variable `CS_DATA_DIR` containing the path to the separated data files.
- For a given combination of neutron energy and target DNA depth, execute `run_simulation.py`.

```
1 python run_simulation.py <neutron_energy> <dna_depth> <output_path>
```

185  
186  
187  
188  
189  
190  
191  
192  
193  
194  
195  
196  
197  
198  
199  
200  
201  
202  
203  
204  
205  
206  
207  
208  
209  
210  
211  
212  
213  
214  
215  
216  
217  
218  
219  
220  
221  
222  
223  
224  
225  
226  
227  
228  
229  
230
