# Supplementary material for: Evaluating the risk of data loss due to particle radiation damage in a DNA data storage system
Source: PubMed Central journal article supplement (PMC11401870; doi:10.1038/s41467-024-51768-x), 2024-09-14
Supplement: 41467_2024_51768_MOESM3_ESM.pdf [file 41467_2024_51768_MOESM3_ESM.pdf]

Title: Supplementary Software

Description: The script used to run Monte Carlo simulations.

Title: Supplementary Data 1

Description: Parameters used to run Monte Carlo simulations.
